# Supplementary material for: Enhancing gold nanoparticle immobilization on thiolated silica: utilizing neutral ligands to achieve maximum surface coverage for improved SERS substrates
Source: Royal Society of Chemistry journal article supplement (doi:10.1039/d3tc04577c), 2024-01-01
Supplement: d3tc04577c1.pdf [file d3tc04577c1.pdf]

## Supporting information

# Enhancing Gold Nanoparticle Immobilization on Thiolated Silica: Utilizing Neutral Ligands to Achieve Maximum Surface Coverage for Improved SERS Substrates

*Orisson P. Gomes<sup>1,2</sup>, Sanggon Kim<sup>1,5,\*</sup>, Paulo N. Lisboa-Filho<sup>3</sup>, Augusto Batagin-Neto<sup>4</sup>, Yves De Koninck<sup>1,5</sup>, Younes Messaddeq<sup>1,\*</sup>*

*1 Center for Optics, Photonics and Lasers (COPL), Department of Physics, Université Laval, Québec, QC G1V 0A6, Canada*

*2 São Paulo State University (UNESP), School of Sciences, POSMAT, Bauru/SP 17033-360, Brazil*

*3 São Paulo State University (UNESP), School of Sciences, Department of Physics, Bauru/SP 17033-360, Brazil*

*4 São Paulo State University (UNESP), Campus of Itapeva, Itapeva/SP 18409-010, Brazil*

*5 CERVO Brain Research Centre, Quebec Mental Health Institute, Department of Psychiatry and Neuroscience, Université Laval, Québec, QC G1E 1T2, Canada*

## SERS enhancement factor (EF) calculation

The total number of 4-MBA molecules present in a bulk 4-MBA was determined using the following equation.<sup>1,2</sup>:

$$N_{bulk} = \frac{\rho V N_a}{M}$$

where  $\rho$  represents the molecular density of 4-MBA (1.489 g/cm<sup>3</sup>),  $V$  is the laser-excited volume within the bulk material,  $N_a$  is Avogadro's constant ( $6.02 \times 10^{23}$  molecules/mol), and  $M$  is the molecular weight of 4-MBA (154 g/mol). The laser-excited volume  $V$  is calculated as  $V = A_{Laser} z$ , with  $z$  being the depth of the field for the Raman spectrometer and  $A_{Laser}$  being the laser-irradiated area. For a 633 nm laser used with a 50x objective lens (0.5NA),  $A_{Laser}$  was found to be 2.72  $\mu\text{m}^2$  (beam radius: 0.93  $\mu\text{m}$ , as shown in **Figure S1a**).

To establish the depth of the field (DOF,  $z$ ), we utilized a single-crystal silicon wafer to map the depth profile of our Raman spectrometer. The silicon wafer was moved vertically in 2  $\mu\text{m}$  increments, and the Raman spectra were recorded, as depicted in **Figure S2a**. **Figure S2b** displays the Raman spectra of the Si wafer as a function of the distance from the focal plane to the Si substrate surface. The intensity profile of the peak at 520.6 cm<sup>-1</sup>, shown in **Figure S1b**, delineates the DOF as 49.4  $\mu\text{m}$ . Given that the Raman scattering for bulk 4-MBA was measured at the focal plane on the 4-MBA bulk surface, we utilized half of the DOF value for  $z$  in our calculations.

The total number of 4-MBA molecules forming a monolayer on AuNPs was calculated using the equation:

$$N_{SERS} = A_{AuNP} N_{AuNP} \sigma$$

where  $\sigma$  indicates the surface density of the 4-MBA on the AuNP surface, estimated at 5.263 nm<sup>-2</sup>.<sup>3</sup>  $A_{AuNP}$  is the surface area of a single AuNP (0.013  $\mu\text{m}^2$ ) and  $N_{AuNP}$  is the count of the AuNPs within the area illuminated by the laser. The number of AuNPs,  $N_{AuNP}$ , which is 438, was calculated as:

$$N_{AuNP} = A_{Laser} / A_{C-AuNP} \xi$$

In this equation,  $A_{C-AuNP}$  stands for the cross-sectional area of a single AuNP and  $\xi$  represents the surface coverage rate (0.533).

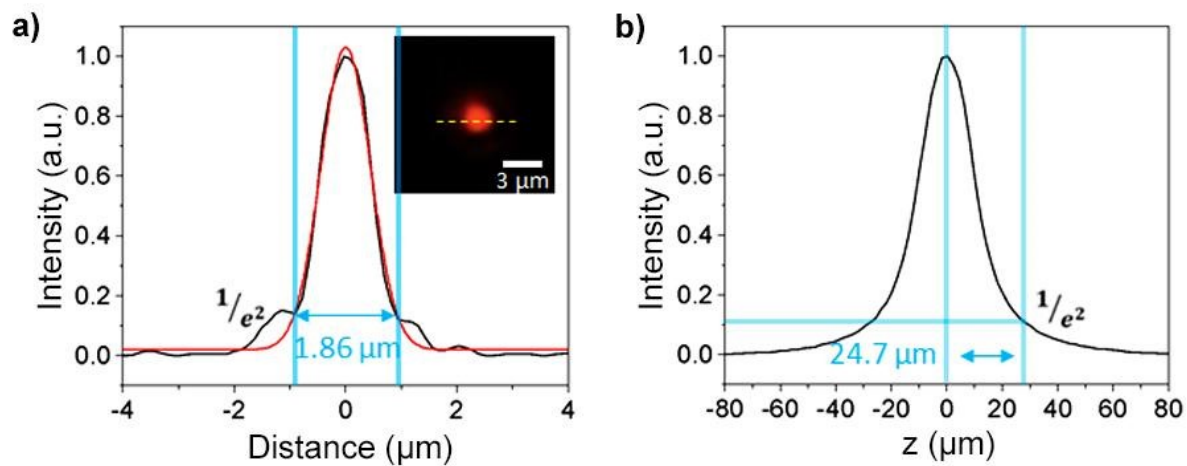

**Figure S1.** Laser beam (633 nm) profile and Raman intensity-depth profile based on the integrated intensity of the  $520.6 \text{ cm}^{-1}$  band for a silica wafer.

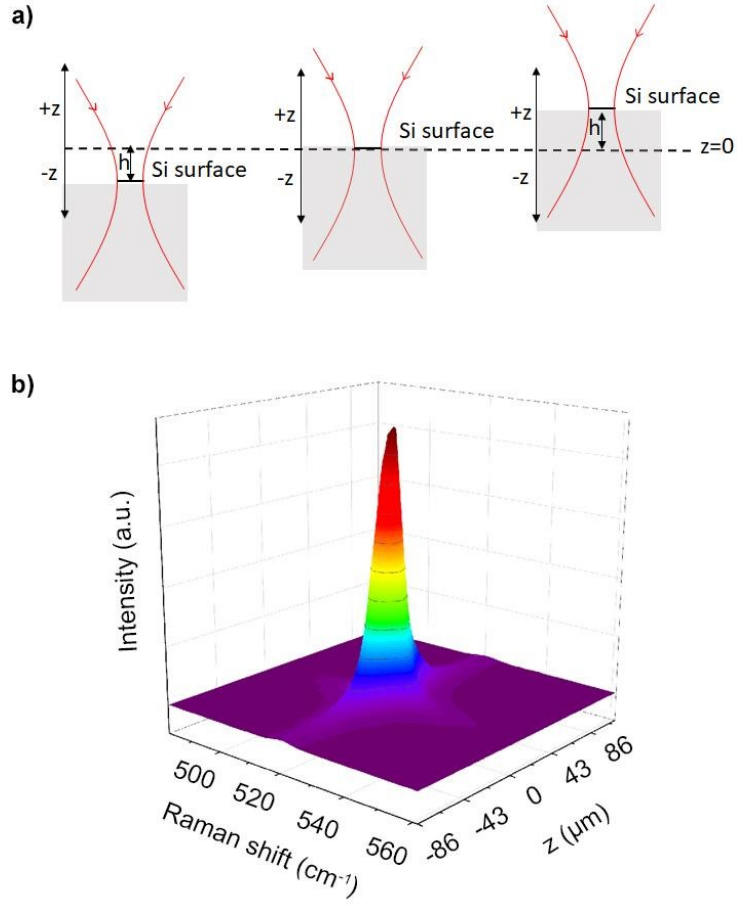

**Figure S2.** Schematic illustrating how a specific plane of illuminated bulk material (Si wafer) contributes to  $I_{bulk}$ , demonstrating the method for determining the depth dependency of the Raman signal.

## References

- 1 W. B. Cai, B. Ren, X. Q. Li, C. X. She, F. M. Liu, X. W. Cai and Z. Q. Tian, *Surf. Sci.*, 1998, **406**, 9–22.
- 2 A. B. Serrano-Montes, D. Jimenez de Aberasturi, J. Langer, J. J. Giner-Casares, L. Scarabelli, A. Herrero and L. M. Liz-Marzán, *Langmuir*, 2015, **31**, 9205–9213.
- 3 E. M. Perassi, C. Hrelescu, A. Wisnet, M. Döblinger, C. Scheu, F. Jäckel, E. A. Coronado and J. Feldmann, *ACS Nano*, 2014, **8**, 4395–4402.
